# Supplementary material
Source: Elsevier journal article supplement (https://www.sciencedirect.com/science/article/pii/S0378595522000557)
Supplement: mmc1 [file 1-s2.0-S0378595522000557-mmc1.pdf]

# AUTHORSHIP STATEMENT

Manuscript title: Is human underwater hearing mediated by bone conduction?

---

---

All persons who meet authorship criteria are listed as authors, and all authors certify that they have participated sufficiently in the work to take public responsibility for the content, including participation in the concept, design, analysis, writing, or revision of the manuscript. Furthermore, each author certifies that this material or similar material has not been and will not be submitted to or published in any other publication.

## Authorship contributions

### *Category 1*

Conception and design of study: K. Sørensen, M. Wahlberg, \_\_\_\_\_, \_\_\_\_\_;

acquisition of data: K. Sørensen, \_\_\_\_\_, \_\_\_\_\_, \_\_\_\_\_;

analysis and/or interpretation of data: K. Sørensen, M. Wahlberg, J. Christensen-Dalsgaard.

### *Category 2*

Drafting the manuscript: K. Sørensen, M. Wahlberg, \_\_\_\_\_, \_\_\_\_\_;

revising the manuscript critically for important intellectual content: K. Sørensen, M. Wahlberg,

J. Christensen-Dalsgaard, \_\_\_\_\_.

### *Category 3*

Approval of the version of the manuscript to be published:

K. Sørensen, M. Wahlberg, J. Christensen-Dalsgaard, \_\_\_\_\_,

\_\_\_\_\_, \_\_\_\_\_, \_\_\_\_\_, \_\_\_\_\_.
